# Supplementary material
Source: PubMed Central journal article supplement (PMC2481348)
Supplement: 0802202105_0802202105SI.pdf [file 0802202105_0802202105SI.pdf]

# Supporting Information

Bharat *et al.* 10.1073/pnas.0802202105

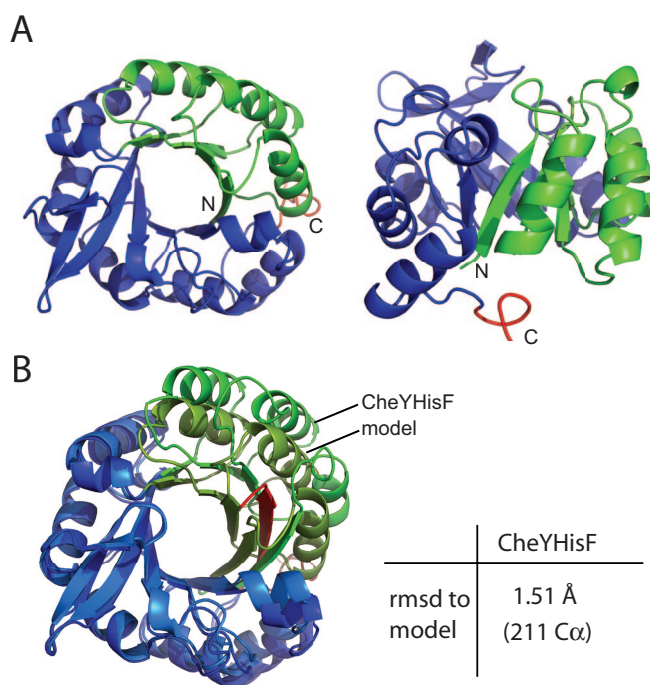

**Fig. S1.** Model of the originally expected  $(\beta\alpha)_8$ -barrel structure of CheYHisF. (A) Ribbon diagram of the model top and side view. The model was generated with the program Modeller (1), using an alignment of CheY and HisF from *T. maritima* and the structures with the Protein Data Bank identifiers 1TMY (CheY) and 1THF (HisF). The part originating from CheY is shown in green and the part originating from HisF is shown in blue, the residues forming the new  $\beta$ -strand in the crystal structure are shown in red. (B) Comparison of the model (lighter colors) with the x-ray structure (darker colors). The two structures superimpose with an rmsd of 1.51 Å over 211 C $\alpha$ -atoms. The superposition was generated with the program STAMP (2).

1. Sali A, Blundell TL (1993) Comparative protein modeling by satisfaction of spatial restraints. *J Mol Biol* 234:779–815.

2. Russell RB, Barton GJ (1992) Multiple protein sequence alignment from tertiary structure comparison: assignment of global and residue confidence levels. *Proteins* 14:309–323.

**Table S1. Secondary structural content calculated from FT-IR data, using multivariate pattern recognition (1) and from the DSSP patterns of the crystal structures (2)**

| Protein         | Calculated from IR-data | Deduced from x-ray structure |
|-----------------|-------------------------|------------------------------|
| CheYHisF        |                         |                              |
| $\alpha$ -Helix | 29.2%                   | 37.6% (40.1%)                |
| $\beta$ -Sheet  | 23.8%                   | 24.5% (23.2%)                |
| HisF            |                         |                              |
| $\alpha$ -Helix | 38.0%                   | 36.8%                        |
| $\beta$ -Sheet  | 20.4%                   | 24.1%                        |
| CheY            |                         |                              |
| $\alpha$ -Helix | 51.4%                   | 48.7%                        |
| $\beta$ -Sheet  | 22.0%                   | 21.0%                        |

The CheYHisF values in brackets are the sum of the DSSP patterns of the parental fragments.

1. Fabian H, Schultz CP (2000) in *Encyclopedia of Anal Chem*, ed Meyers RA (Wiley, Chichester, UK), pp 5799.
2. Kabsch W, Sander C (1983) Dictionary of protein secondary structure; pattern recognition of hydrogen-bonded and geometrical features. *Biopolymers* 22, 2577–637.

**Table S2. Summary of data collection and refinement statistics**

|                                     |                   |
|-------------------------------------|-------------------|
| Data collection                     |                   |
| Wavelength, Å                       | 1.071             |
| Space group                         | $P4_12_12$        |
| Resolution, Å                       | 40–3.1 (3.27–3.1) |
| Unique reflections                  | 8,681 (1,386)     |
| Redundancy                          | 13.4 (13.6)       |
| Completeness, %                     | 92.3 (94.8)       |
| $R_{\text{merge}}$ , %              | 9.3 (54.9)        |
| $I/\sigma(I)$                       | 18.5 (2.4)        |
| Wilson B factor                     | 95.9              |
| Refinement statistics               |                   |
| Space group                         | $P4_12_12$        |
| Resolution, Å                       | 30–3.1 (3.18–3.1) |
| $R_{\text{cryst}}$ , %              | 0.22 (0.35)       |
| $R_{\text{free}}$ , %               | 0.25 (0.37)       |
| Nonhydrogen atoms                   | 1,854             |
| Waters                              | 32                |
| Ligand (sulfate)                    | 2                 |
| Mean B-value, Å <sup>2</sup>        | 102               |
| rmsd of bond length, Å <sup>2</sup> | 0.01              |
| rmsd of angle, °                    | 1.43              |
| Model quality                       |                   |
| Residues in most favored region     | 200 (86%)         |
| Residues in most allowed region     | 24 (10.3%)        |
| Residues in outlier region          | 9 (3.7%)          |
